# Supplementary material for: Unlocking the full potential of solar cell materials: parameter sensitivity analysis and optimization using response surface modelling
Source: Royal Society of Chemistry journal article supplement (doi:10.1039/d4ma00728j), 2024-12-11
Supplement: d4ma00728j1.pdf [file d4ma00728j1.pdf]

## Unlocking the Full Potential of Solar Cell Materials: Parameter Sensitivity Analysis and Optimization Using Response Surface Modelling

Manoj Kumar<sup>1\*</sup>, Sanju Rani<sup>2</sup>, Xu Wang<sup>3\*</sup>, Vidya Nand Singh<sup>4\*</sup>

<sup>1</sup>School of Basic and Applied Science, IILM University, Knowledge Park-II, Greater Noida, Uttar Pradesh- 201306

<sup>2</sup>Department of Electrical Engineering, Indian Institute of Technology Mandi, Kamand, Himachal Pradesh 175075, India

<sup>3</sup>School of Engineering, RMIT University Victoria 3001, Australia

<sup>4</sup>Indian Reference Materials (BND) Division, CSIR-National Physical Laboratory, Dr. K. S. Krishnan Marg, New Delhi-110012, India

**Table S1. Input parameters/variables for the device**

| Parameter                                                              | SnSe                                    | TiO <sub>2</sub> [1] | SnO <sub>2</sub>        |
|------------------------------------------------------------------------|-----------------------------------------|----------------------|-------------------------|
| Thickness (μm)                                                         | 1.2                                     | 0.10                 | 0.2                     |
| Band gap (eV)                                                          | 1-1.5 [2]                               | 2.26                 | 3.6 [3]                 |
| Electron Affinity (eV)                                                 | 4.2 [2], [4]                            | 4.1-4.5              | 4.53 [3]                |
| Valence band density of states (cm <sup>-3</sup> )                     | 1.6 x10 <sup>18</sup>                   | 6 x10 <sup>17</sup>  | 1 x10 <sup>19</sup> [5] |
| Conduction band density of states (cm <sup>-3</sup> )                  | 1.45 x10 <sup>18</sup>                  | 2 x10 <sup>17</sup>  | 1 x10 <sup>19</sup> [6] |
| Radiative recombination coefficient (cm <sup>3</sup> s <sup>-1</sup> ) | 2.9 x10 <sup>-11</sup>                  | 1 x10 <sup>-8</sup>  | 1 x10 <sup>-8</sup>     |
| Mobility of electron/hole (cm <sup>2</sup> /Vs)                        | 130/56.7 [7]                            | 100/50               | 5/2.5 [6]               |
| Absorption coefficient                                                 | 5 x10 <sup>4</sup> [2]                  | -                    | -                       |
| Uniform Acceptor density (cm <sup>-3</sup> )                           | 9x10 <sup>15</sup> - 4x10 <sup>16</sup> | -                    | -                       |
| Uniform donor density (cm <sup>-3</sup> )                              | -                                       | 1x10 <sup>17</sup>   | 1x10 <sup>19</sup> [5]  |

Band gap of the TiO<sub>2</sub> is taken as 2.26 (which can be easily obtained after doping[8], [9]).

| LAYER 1                                                 |                                                                           | SnSe                 |  | LAYER 2                                                 |                                                                           | TiO2                 |  |
|---------------------------------------------------------|---------------------------------------------------------------------------|----------------------|--|---------------------------------------------------------|---------------------------------------------------------------------------|----------------------|--|
| thickness ( $\mu\text{m}$ )                             | 1.200                                                                     | uniform pure A (y=0) |  | thickness ( $\mu\text{m}$ )                             | 0.100                                                                     | uniform pure A (y=0) |  |
| The layer is pure A: y = 0, uniform                     | 0.000                                                                     |                      |  | The layer is pure A: y = 0, uniform                     | 0.000                                                                     |                      |  |
| Semiconductor Property P of the pure material           | pure A (y = 0)                                                            |                      |  | Semiconductor Property P of the pure material           | pure A (y = 0)                                                            |                      |  |
| bandgap (eV)                                            | 1.380                                                                     |                      |  | bandgap (eV)                                            | 2.260                                                                     |                      |  |
| electron affinity (eV)                                  | 4.200                                                                     |                      |  | electron affinity (eV)                                  | 4.200                                                                     |                      |  |
| dielectric permittivity (relative)                      | 12.500                                                                    |                      |  | dielectric permittivity (relative)                      | 10.000                                                                    |                      |  |
| CB effective density of states ( $1/\text{cm}^3$ )      | 1.450E+18                                                                 |                      |  | CB effective density of states ( $1/\text{cm}^3$ )      | 2.000E+17                                                                 |                      |  |
| VB effective density of states ( $1/\text{cm}^3$ )      | 1.600E+18                                                                 |                      |  | VB effective density of states ( $1/\text{cm}^3$ )      | 6.000E+17                                                                 |                      |  |
| electron thermal velocity (cm/s)                        | 1.000E+7                                                                  |                      |  | electron thermal velocity (cm/s)                        | 1.000E+7                                                                  |                      |  |
| hole thermal velocity (cm/s)                            | 1.000E+7                                                                  |                      |  | hole thermal velocity (cm/s)                            | 1.000E+7                                                                  |                      |  |
| electron mobility ( $\text{cm}^2/\text{Vs}$ )           | 1.300E+2                                                                  |                      |  | electron mobility ( $\text{cm}^2/\text{Vs}$ )           | 1.000E+2                                                                  |                      |  |
| hole mobility ( $\text{cm}^2/\text{Vs}$ )               | 5.670E+1                                                                  |                      |  | hole mobility ( $\text{cm}^2/\text{Vs}$ )               | 5.000E+1                                                                  |                      |  |
| <input type="checkbox"/> Allow Tunneling                | effective mass of electron: 1.000E+0<br>effective mass of holes: 1.000E+0 |                      |  | <input type="checkbox"/> Allow Tunneling                | effective mass of electron: 1.000E+0<br>effective mass of holes: 1.000E+0 |                      |  |
| no ND grading (uniform)                                 |                                                                           |                      |  | no ND grading (uniform)                                 |                                                                           |                      |  |
| shallow uniform donor density ND ( $1/\text{cm}^3$ )    | 0.000E+0                                                                  |                      |  | shallow uniform donor density ND ( $1/\text{cm}^3$ )    | 1.000E+17                                                                 |                      |  |
| no NA grading (uniform)                                 |                                                                           |                      |  | no NA grading (uniform)                                 |                                                                           |                      |  |
| shallow uniform acceptor density NA ( $1/\text{cm}^3$ ) | 4.000E+16                                                                 |                      |  | shallow uniform acceptor density NA ( $1/\text{cm}^3$ ) | 0.000E+0                                                                  |                      |  |

Figure S1 The input parameters for the SnSe (left ) and for TiO<sub>2</sub> (right) in SCAPS-1D.

Table S2. Set of parameters ( $z_i$ ) (with 5 variables, face-centered alpha =1.56508) using central composite design (CCD).

| Sr. No. | $Z_1$ | $Z_2$ | $Z_3$ | $Z_4$ | $Z_5$ |
|---------|-------|-------|-------|-------|-------|
| 1       | -1    | -1    | -1    | -1    | -1    |
| 2       | 1     | -1    | -1    | -1    | -1    |
| 3       | -1    | 1     | -1    | -1    | -1    |
| 4       | 1     | 1     | -1    | -1    | -1    |
| 5       | -1    | -1    | 1     | -1    | -1    |
| 6       | 1     | -1    | 1     | -1    | -1    |
| 7       | -1    | 1     | 1     | -1    | -1    |
| 8       | 1     | 1     | 1     | -1    | -1    |
| 9       | -1    | -1    | -1    | 1     | -1    |
| 10      | 1     | -1    | -1    | 1     | -1    |
| 11      | -1    | 1     | -1    | 1     | -1    |
| 12      | 1     | 1     | -1    | 1     | -1    |
| 13      | -1    | -1    | 1     | 1     | -1    |
| 14      | 1     | -1    | 1     | 1     | -1    |
| 15      | -1    | 1     | 1     | 1     | -1    |
| 16      | 1     | 1     | 1     | 1     | -1    |
| 17      | -1    | -1    | -1    | -1    | 1     |
| 18      | 1     | -1    | -1    | -1    | 1     |
| 19      | -1    | 1     | -1    | -1    | 1     |
| 20      | 1     | 1     | -1    | -1    | 1     |
| 21      | -1    | -1    | 1     | -1    | 1     |
| 22      | 1     | -1    | 1     | -1    | 1     |
| 23      | -1    | 1     | 1     | -1    | 1     |
| 24      | 1     | 1     | 1     | -1    | 1     |

|    |          |          |          |          |          |
|----|----------|----------|----------|----------|----------|
| 25 | -1       | -1       | -1       | 1        | 1        |
| 26 | 1        | -1       | -1       | 1        | 1        |
| 27 | -1       | 1        | -1       | 1        | 1        |
| 28 | 1        | 1        | -1       | 1        | 1        |
| 29 | -1       | -1       | 1        | 1        | 1        |
| 30 | 1        | -1       | 1        | 1        | 1        |
| 31 | -1       | 1        | 1        | 1        | 1        |
| 32 | 1        | 1        | 1        | 1        | 1        |
| 33 | -1.56058 | 0        | 0        | 0        | 0        |
| 34 | 1.56058  | 0        | 0        | 0        | 0        |
| 35 | 0        | -1.56058 | 0        | 0        | 0        |
| 36 | 0        | 1.56058  | 0        | 0        | 0        |
| 37 | 0        | 0        | -1.56058 | 0        | 0        |
| 38 | 0        | 0        | 1.56058  | 0        | 0        |
| 39 | 0        | 0        | 0        | -1.56058 | 0        |
| 40 | 0        | 0        | 0        | 1.56058  | 0        |
| 41 | 0        | 0        | 0        | 0        | -1.56058 |
| 42 | 0        | 0        | 0        | 0        | 1.56058  |
| 43 | 0        | 0        | 0        | 0        | 0        |
| 44 | 0        | 0        | 0        | 0        | 0        |
| 45 | 0        | 0        | 0        | 0        | 0        |
| 46 | 0        | 0        | 0        | 0        | 0        |
| 47 | 0        | 0        | 0        | 0        | 0        |
| 48 | 0        | 0        | 0        | 0        | 0        |
| 49 | 0        | 0        | 0        | 0        | 0        |
| 50 | 0        | 0        | 0        | 0        | 0        |

**Table S3 Input parameters using the CCD for the simulation and their efficiency after simulation by SCAPS-1D**

| Sr. No. | Band Gap (x <sub>1</sub> )<br>eV | Shallow Acceptor Density (x <sub>2</sub> )<br>1/cm <sup>3</sup> | CBO(x <sub>3</sub> )<br>eV | W.F. (x <sub>4</sub> )<br>eV | Temp. (x <sub>5</sub> )<br>K | Efficiency (R)<br>% |
|---------|----------------------------------|-----------------------------------------------------------------|----------------------------|------------------------------|------------------------------|---------------------|
| 1       | 1                                | 9 x10 <sup>+15</sup>                                            | -0.1                       | 4.8                          | 275                          | 15.77               |
| 2       | 1.5                              | 9x10 <sup>+15</sup>                                             | -0.1                       | 4.8                          | 275                          | 9.02                |
| 3       | 1                                | 4x10 <sup>+16</sup>                                             | -0.1                       | 4.8                          | 275                          | 17.12               |
| 4       | 1.5                              | 4x10 <sup>+16</sup>                                             | -0.1                       | 4.8                          | 275                          | 9.84                |
| 5       | 1                                | 9x10 <sup>+15</sup>                                             | 0.3                        | 4.8                          | 275                          | 16.54               |
| 6       | 1.5                              | 9x10 <sup>+15</sup>                                             | 0.3                        | 4.8                          | 275                          | 9.17                |
| 7       | 1                                | 4x10 <sup>+16</sup>                                             | 0.3                        | 4.8                          | 275                          | 18.21               |
| 8       | 1.5                              | 4x10 <sup>+16</sup>                                             | 0.3                        | 4.8                          | 275                          | 10.23               |

|    |         |                           |        |         |         |       |
|----|---------|---------------------------|--------|---------|---------|-------|
| 9  | 1       | $9 \times 10^{+15}$       | -0.1   | 5.4     | 275     | 27.31 |
| 10 | 1.5     | $9 \times 10^{+15}$       | -0.1   | 5.4     | 275     | 19.97 |
| 11 | 1       | $4 \times 10^{+16}$       | -0.1   | 5.4     | 275     | 27.3  |
| 12 | 1.5     | $4 \times 10^{+16}$       | -0.1   | 5.4     | 275     | 19.98 |
| 13 | 1       | $9 \times 10^{+15}$       | 0.3    | 5.4     | 275     | 29.95 |
| 14 | 1.5     | $9 \times 10^{+15}$       | 0.3    | 5.4     | 275     | 19.47 |
| 15 | 1       | $4 \times 10^{+16}$       | 0.3    | 5.4     | 275     | 29.95 |
| 16 | 1.5     | $4 \times 10^{+16}$       | 0.3    | 5.4     | 275     | 20.01 |
| 17 | 1       | $9 \times 10^{+15}$       | -0.1   | 4.8     | 320     | 14.99 |
| 18 | 1.5     | $9 \times 10^{+15}$       | -0.1   | 4.8     | 320     | 9.23  |
| 19 | 1       | $4 \times 10^{+16}$       | -0.1   | 4.8     | 320     | 16.22 |
| 20 | 1.5     | $4 \times 10^{+16}$       | -0.1   | 4.8     | 320     | 10.18 |
| 21 | 1       | $9 \times 10^{+15}$       | 0.3    | 4.8     | 320     | 14.68 |
| 22 | 1.5     | $9 \times 10^{+15}$       | 0.3    | 4.8     | 320     | 8.85  |
| 23 | 1       | $4 \times 10^{+16}$       | 0.3    | 4.8     | 320     | 16.1  |
| 24 | 1.5     | $4 \times 10^{+16}$       | 0.3    | 4.8     | 320     | 9.98  |
| 25 | 1       | $9 \times 10^{+15}$       | -0.1   | 5.4     | 320     | 26.44 |
| 26 | 1.5     | $9 \times 10^{+15}$       | -0.1   | 5.4     | 320     | 18.8  |
| 27 | 1       | $4 \times 10^{+16}$       | -0.1   | 5.4     | 320     | 26.44 |
| 28 | 1.5     | $4 \times 10^{+16}$       | -0.1   | 5.4     | 320     | 18.85 |
| 29 | 1       | $9 \times 10^{+15}$       | 0.3    | 5.4     | 320     | 27.18 |
| 30 | 1.5     | $9 \times 10^{+15}$       | 0.3    | 5.4     | 320     | 17.94 |
| 31 | 1       | $4 \times 10^{+16}$       | 0.3    | 5.4     | 320     | 27.18 |
| 32 | 1.5     | $4 \times 10^{+16}$       | 0.3    | 5.4     | 320     | 18.42 |
| 33 | 0.85873 | $2.45 \times 10^{+16}$    | 0.1    | 5.1     | 297.5   | 23.09 |
| 34 | 1.64127 | $2.45 \times 10^{+16}$    | 0.1    | 5.1     | 297.5   | 13.26 |
| 35 | 1.25    | $2.4126 \times 10^{+14}$  | 0.1    | 5.1     | 297.5   | 16.16 |
| 36 | 1.25    | $4.87587 \times 10^{+16}$ | 0.1    | 5.1     | 297.5   | 20.21 |
| 37 | 1.25    | $2.45 \times 10^{+16}$    | -0.213 | 5.1     | 297.5   | 16.7  |
| 38 | 1.25    | $2.45 \times 10^{+16}$    | 0.413  | 5.1     | 297.5   | 17.82 |
| 39 | 1.25    | $2.45 \times 10^{+16}$    | 0.1    | 4.63048 | 297.5   | 9.31  |
| 40 | 1.25    | $2.45 \times 10^{+16}$    | 0.1    | 5.56952 | 297.5   | 29.94 |
| 41 | 1.25    | $2.45 \times 10^{+16}$    | 0.1    | 5.1     | 262.286 | 21.69 |
| 42 | 1.25    | $2.45 \times 10^{+16}$    | 0.1    | 5.1     | 332.714 | 18.1  |
| 43 | 1.25    | $2.45 \times 10^{+16}$    | 0.1    | 5.1     | 297.5   | 19.98 |
| 44 | 1.25    | $2.45 \times 10^{+16}$    | 0.1    | 5.1     | 297.5   | 19.98 |
| 45 | 1.25    | $2.45 \times 10^{+16}$    | 0.1    | 5.1     | 297.5   | 19.98 |
| 46 | 1.25    | $2.45 \times 10^{+16}$    | 0.1    | 5.1     | 297.5   | 19.98 |
| 47 | 1.25    | $2.45 \times 10^{+16}$    | 0.1    | 5.1     | 297.5   | 19.98 |
| 48 | 1.25    | $2.45 \times 10^{+16}$    | 0.1    | 5.1     | 297.5   | 19.98 |
| 49 | 1.25    | $2.45 \times 10^{+16}$    | 0.1    | 5.1     | 297.5   | 19.98 |
| 50 | 1.25    | $2.45 \times 10^{+16}$    | 0.1    | 5.1     | 297.5   | 19.98 |

**Tablx10 S4. Actual value of the efficiency from SCAPS-1D software and the predicted value of the efficiency by RSM model and their Residual.**

| <b>Run Order</b> | <b>Actual Value of Efficiency</b> | <b>Predicted Value of Efficiency</b> | <b>Residual</b> |
|------------------|-----------------------------------|--------------------------------------|-----------------|
| 1                | 18.10                             | 18.84                                | -0.7404         |
| 2                | 9.98                              | 9.36                                 | 0.6159          |
| 3                | 19.98                             | 19.86                                | 0.1225          |
| 4                | 18.21                             | 18.26                                | -0.0487         |
| 5                | 9.84                              | 10.38                                | -0.5394         |
| 6                | 27.30                             | 28.02                                | -0.7165         |
| 7                | 10.18                             | 10.05                                | 0.1303          |
| 8                | 16.10                             | 15.99                                | 0.1110          |
| 9                | 18.80                             | 19.09                                | -0.2909         |
| 10               | 19.98                             | 19.86                                | 0.1225          |
| 11               | 9.23                              | 8.59                                 | 0.6389          |
| 12               | 10.23                             | 10.70                                | -0.4688         |
| 13               | 23.09                             | 24.51                                | -1.42           |
| 14               | 9.02                              | 8.92                                 | 0.0992          |
| 15               | 15.77                             | 15.23                                | 0.5392          |
| 16               | 16.22                             | 15.42                                | 0.7954          |
| 17               | 29.94                             | 28.40                                | 1.54            |
| 18               | 16.54                             | 16.80                                | -0.2602         |
| 19               | 19.98                             | 19.81                                | 0.1709          |
| 20               | 9.17                              | 9.24                                 | -0.0702         |
| 21               | 13.26                             | 12.91                                | 0.3522          |
| 22               | 19.98                             | 19.86                                | 0.1225          |
| 23               | 16.70                             | 17.45                                | -0.7504         |

|    |       |       |         |
|----|-------|-------|---------|
| 24 | 19.98 | 19.86 | 0.1225  |
| 25 | 16.16 | 18.00 | -1.84   |
| 26 | 20.01 | 20.13 | -0.1185 |
| 27 | 27.31 | 27.63 | -0.3180 |
| 28 | 20.21 | 19.44 | 0.7661  |
| 29 | 14.99 | 13.97 | 1.02    |
| 30 | 17.12 | 16.69 | 0.4307  |
| 31 | 21.69 | 20.87 | 0.8155  |
| 32 | 26.44 | 26.75 | -0.3118 |
| 33 | 19.47 | 19.74 | -0.2700 |
| 34 | 18.85 | 19.48 | -0.6294 |
| 35 | 8.85  | 7.91  | 0.9444  |
| 36 | 19.98 | 19.86 | 0.1225  |
| 37 | 29.95 | 29.59 | 0.3641  |
| 38 | 14.68 | 14.53 | 0.1495  |
| 39 | 19.98 | 19.86 | 0.1225  |
| 40 | 19.97 | 19.42 | 0.5495  |
| 41 | 17.94 | 18.41 | -0.4653 |
| 42 | 27.18 | 27.32 | -0.1362 |
| 43 | 27.18 | 26.93 | 0.2523  |
| 44 | 9.31  | 11.32 | -2.01   |
| 45 | 17.82 | 18.14 | -0.3220 |
| 46 | 19.98 | 19.86 | 0.1225  |
| 47 | 26.44 | 26.36 | 0.0767  |
| 48 | 19.98 | 19.86 | 0.1225  |
| 49 | 29.95 | 29.20 | 0.7526  |
| 50 | 18.42 | 18.79 | -0.3738 |

The figure shows two side-by-side screenshots of the SCAPS 3.3.10 Layer Properties Panel. The left panel is for SnSe and the right panel is for TiO2. Both panels show material properties, doping profiles, and absorption models.

| Property                                                 | SnSe (Layer 1)                      | TiO2 (Layer 2)                      |
|----------------------------------------------------------|-------------------------------------|-------------------------------------|
| Thickness (μm)                                           | 1.200                               | 0.100                               |
| The layer is pure A: y = 0, uniform                      | 0.000                               | 0.000                               |
| Semiconductor Property P of the pure mater               | pure A (y = 0)                      | pure A (y = 0)                      |
| bandgap (eV)                                             | 1.000                               | 2.260                               |
| electron affinity (eV)                                   | 4.200                               | 4.364                               |
| dielectric permittivity (relative)                       | 12.500                              | 10.000                              |
| CB effective density of states (1/cm <sup>3</sup> )      | 1.450E+18                           | 2.000E+17                           |
| VB effective density of states (1/cm <sup>3</sup> )      | 1.600E+18                           | 6.000E+17                           |
| electron thermal velocity (cm/s)                         | 1.000E+7                            | 1.000E+7                            |
| hole thermal velocity (cm/s)                             | 1.000E+7                            | 1.000E+7                            |
| electron mobility (cm <sup>2</sup> /Vs)                  | 1.300E+2                            | 1.000E+2                            |
| hole mobility (cm <sup>2</sup> /Vs)                      | 5.670E+1                            | 5.000E+1                            |
| effective mass of electrons                              | 1.000E+0                            | 1.000E+0                            |
| effective mass of holes                                  | 1.000E+0                            | 1.000E+0                            |
| no ND grading (uniform)                                  | no ND grading (uniform)             | no ND grading (uniform)             |
| shallow uniform donor density ND (1/cm <sup>3</sup> )    | 0.000E+0                            | 1.000E+17                           |
| no NA grading (uniform)                                  | no NA grading (uniform)             | no NA grading (uniform)             |
| shallow uniform acceptor density NA (1/cm <sup>3</sup> ) | 2.890E+16                           | 0.000E+0                            |
| Absorption interpolation model                           | alpha pure A material (y=0)         | alpha pure A material (y=0)         |
| List of absorption submodels present:                    | sqrt(hv-Eg) law (SCAPS traditional) | sqrt(hv-Eg) law (SCAPS traditional) |

Figure S2. Input panel for the (left) SnSe, and (right) TiO<sub>2</sub>.

## References

- [1] W. Ahmad, A. D. Khan, and W. Ahmad, "Design and Simulation of High-Efficiency Two-Dimensional Carbon Nitride Design and Simulation of High-Efficiency Two-Dimensional Carbon Nitride ( C 2 N-h2D ) Solar Cell with SnS ( HTL ) and TiO 2 ( ETL ) via SCAPS-1D," in *Proceedings of the 4th International Conference on Sustainable Energy Technologies (ICSET 2022) Peshawar, Pakistan, 2022*, vol. 2, no. December. doi: 10.5281/zenodo.8047694.
- [2] M. Kumar, S. Rani, Y. Singh, A. Kumar, and V. N. Singh, "Strategy to improve the efficiency of tin selenide based solar cell : A path from 1.02 to 27.72%," *Sol. Energy*, vol. 232, no. November 2021, pp. 146–153, 2022, doi: 10.1016/j.solener.2021.12.069.
- [3] M. U. Hajiev and R. R. Kabulov, "Features of w-sn02/p-si structural heteroj unctio n manufactured by the chemical steam-gas deposition method," *Int. J. Thin Film Sci. Technol.*, vol. 10, no. 2, pp. 83–87, 2021, doi: 10.18576/ijfst/100202.
- [4] M. Kumar *et al.*, "Large area, self-powered, flexible, fast, and broadband photodetector enabled by the SnSe-Sb2Se3 heterostructure," *Surfaces and Interfaces*, vol. 30, no. April, p. 101964, 2022, doi: 10.1016/j.surfin.2022.101964.
- [5] R. A. Rassol, R. F. Hasan, and S. M. Ahmed, "Numerical analysis of SnO2/Zn2SnO4/n-CdS/p-CdTe solar cell using the SCAPS-1D simulation software," *Iraqi J. Sci.*, vol. 62, no. 2, pp. 505–516, 2021, doi: 10.24996/ijs.2021.62.2.17.
- [6] B. A. D. Williamson *et al.*, "Resonant Ta Doping for Enhanced Mobility in Transparent Conducting SnO2," *Chem. Mater.*, vol. 32, no. 5, pp. 1964–1973, 2020, doi: 10.1021/acs.chemmater.9b04845.
- [7] R. K. Yadav *et al.*, "A qualitative study of SnSe thin film solar cells using SCAPS 1D and comparison with experimental results: A pathway towards 22.69% efficiency," *Sol. Energy*

*Mater. Sol. Cells*, vol. 244, no. May, p. 111835, 2022, doi: 10.1016/j.solmat.2022.111835.

- [8] W. Li *et al.*, “Band gap tailoring of Nd<sup>3+</sup>-doped TiO<sub>2</sub> nanoparticles,” *Appl. Phys. Lett.*, vol. 83, no. 20, pp. 4143–4145, 2003, doi: 10.1063/1.1627962.
- [9] V. A. Mu'izayanti and H. Sutrisno, “Structural and optical properties of AgCl-sensitized TiO<sub>2</sub> (TiO<sub>2</sub>@AgCl) prepared by a reflux technique under alkaline condition,” *Ceramica*, vol. 64, no. 370, pp. 190–196, 2018, doi: 10.1590/0366-69132018643702311.
